# Supplementary material
Source: publisher figshare collection journal article supplement (https://acs.figshare.com/ndownloader/files/34552117)
Supplement: Supplementary file 1 [file 34552117]

## **Modeling the Reduction Kinetics of Munition Compounds by Humic Acids**

Kevin P. Hickey, Jimmy Murillo-Gelvez, Dominic M. Di Toro \*, Herbert E. Allen, Richard F. Carbonaro # , Pei C. Chiu

Department of Civil and Environmental Engineering,  
University of Delaware, Newark, Delaware 19716, USA

# Department of Chemical Engineering,  
Manhattan College, Riverdale, New York 10471, USA

\* Corresponding Author---Email: [dditorio@udel.edu](mailto:dditorio@udel.edu)

## **Supplementary Information**

## Table of Contents

|                                                                         |    |
|-------------------------------------------------------------------------|----|
| HA Model Framework Description .....                                    | 4  |
| Thermodynamic Description of Model Quinone-like Functional Groups ..... | 6  |
| Functional Group Distribution and Energies .....                        | 9  |
| Reduction Profile of All HAs in Study .....                             | 11 |
| Independent ESHA/NTO Optimization.....                                  | 12 |
| Example of NAC/MC Reduction kinetic Curves in Linear-Linear Scale ..... | 13 |
| Example LHA Input Deck .....                                            | 14 |

## List of Figures

|                                                                                                                                                                                                                                                                                                                                                                                                                                                                                                                                                                                                                 |    |
|-----------------------------------------------------------------------------------------------------------------------------------------------------------------------------------------------------------------------------------------------------------------------------------------------------------------------------------------------------------------------------------------------------------------------------------------------------------------------------------------------------------------------------------------------------------------------------------------------------------------|----|
| <b>Figure S1:</b> Energy Distribution of the ten model functional groups. Reduction energies were distributed evenly between the energy boundaries provided by the reduction profile. $E^{0'}_{\text{H}}$ is the formal potential (pH = 7) relative to the standard hydrogen electrode. $Q_{\text{N}}$ and $Q_{\text{A}}$ are the neutral and anionic function groups respectively. $\Delta_r G^0$ corresponds to the standard state Gibbs free energy (pH= 0) of the reduction reactions for the QFGs (Eqs.1,2 in manuscript) and are used as their formation energies in the speciation calculations.....     | 6  |
| <b>Figure S2:</b> Results of example tableau in table 1. Model HA is comprised of one neutral ( $Q_{\text{N1}}$ ) and one anionic ( $Q_{\text{A1}}$ ) functional group at a 50/50 concentration ratio. Total functional group concentration is 88 $\mu\text{M}$ as calculated from the EAC of LHA. The $Q_{\text{N1}}/Q_{\text{A1}}$ reduction energies were selected as Q3 in Figure S1 simply to bisect the measured values. Top: Red line is model output. Bottom: Concentration of the oxidized and reduced form of the two functional groups as a function of electrons titrated, or reduction extent..... | 7  |
| <b>Figure S3:</b> Calculated HAT oxidation energies as a function of reported formal potential for ten selected hydroquinones.....                                                                                                                                                                                                                                                                                                                                                                                                                                                                              | 8  |
| <b>Figure S4:</b> Measured reduction profiles for Leonardite Humic Acid (LHA), Eliot Soil Humic Acid (ESHA), Suwanee River Humic Acid (SRHA), and Pahokee Peat Humic Acid (PPHA), as well as the Mean HA model fit.....                                                                                                                                                                                                                                                                                                                                                                                         | 11 |
| <b>Figure S5:</b> Reduction profile as potential vs. HA reduction extent for ESHA (blue diamonds) and the model fit (red line). Colored line on base indicates the active or redox controlling functional group as a function of reduction extent (right Y axis).....                                                                                                                                                                                                                                                                                                                                           | 12 |
| <b>Figure S6:</b> NTO concentration as a function of time for reduction with Eliot Soil Humic Acid (ESHA). Dashed and dotted lines correspond to the contribution of NTO loss from individual QFGs (dashed = neutral, dotted = anionic).....                                                                                                                                                                                                                                                                                                                                                                    | 12 |
| <b>Figure S7:</b> NB concentration as a function of time for reduction with Leonardite Humic Acid (LHA) at 30%, 60%, 90% and 100% reduced LHA. Same data presented in Figure 4, row A but plotted on a linear-linear scale. Dashed and dotted lines correspond to the contribution of NB loss from individual QFGs (dashed = neutral, dotted = anionic). .....                                                                                                                                                                                                                                                  | 13 |

### List of Tables

|                                                                                                                                                                                                                                                                                                                                                        |    |
|--------------------------------------------------------------------------------------------------------------------------------------------------------------------------------------------------------------------------------------------------------------------------------------------------------------------------------------------------------|----|
| <b>Table S1:</b> Model fitted functional group distribution for the mean HA model. ....                                                                                                                                                                                                                                                                | 9  |
| <b>Table S2:</b> Formal potentials and HAT oxidation energies for ten real hydroquinones and five model quinone-like functional groups. HAT energies for real hydroquinones are calculated quantum chemically, while the energies for the functional groups are calculated from Eq.8 with slopes and intercepts fitted through the mean HA model. .... | 10 |
| <b>Table S3:</b> Conditions of NAC/MC reduction with HA experiments. ....                                                                                                                                                                                                                                                                              | 10 |

## HA Model Framework Description

**Scheme S1:** Relationships between the HA data being optimized and the model's fitted parameters. Arrows indicate links between model parameters and the optimized data. Equations shown are predominant, but not exhaustive, for each segment.

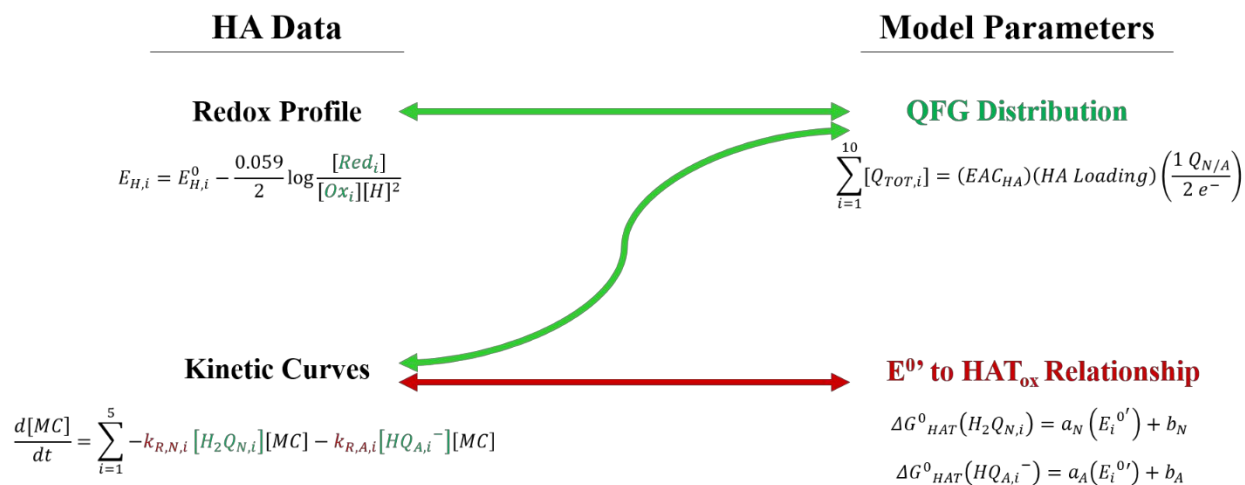

The general framework for the humic acid (HA) model is shown in Scheme S1. The HA reduction profiles and NAC/MC kinetic curves serve as the thermodynamic and kinetic characteristics of a given HA source and are used to calibrate the quinone-like functional groups (QFGs) that comprise the HA model. The unique parameters being fit through this calibration are the QFG distribution and the formal reduction potential ( $E^{0'}$ ) to HAT<sub>ox</sub> energy relationships, as shown in Scheme S1.

The optimization procedure used for HA model calibration is shown in Scheme S2. The program was written and executed in R and utilizes an additional equilibrium speciation program (RANDChem), which was written and compiled in Fortran. The optimization program minimizes the root mean square errors (RMSEs) associated with both the HA reduction profiles and the NAC/MC kinetic curves concurrently through fitting the model parameters outlined in Scheme S1. It does this through a constrained optimization (constrOptim) which ensures that the sum of the QFG fractions does not exceed 1.0.

**Scheme S2:** Program schematic for optimization procedure. Written in R programming language with the use of RandChem equilibrium speciation program (Fortran).

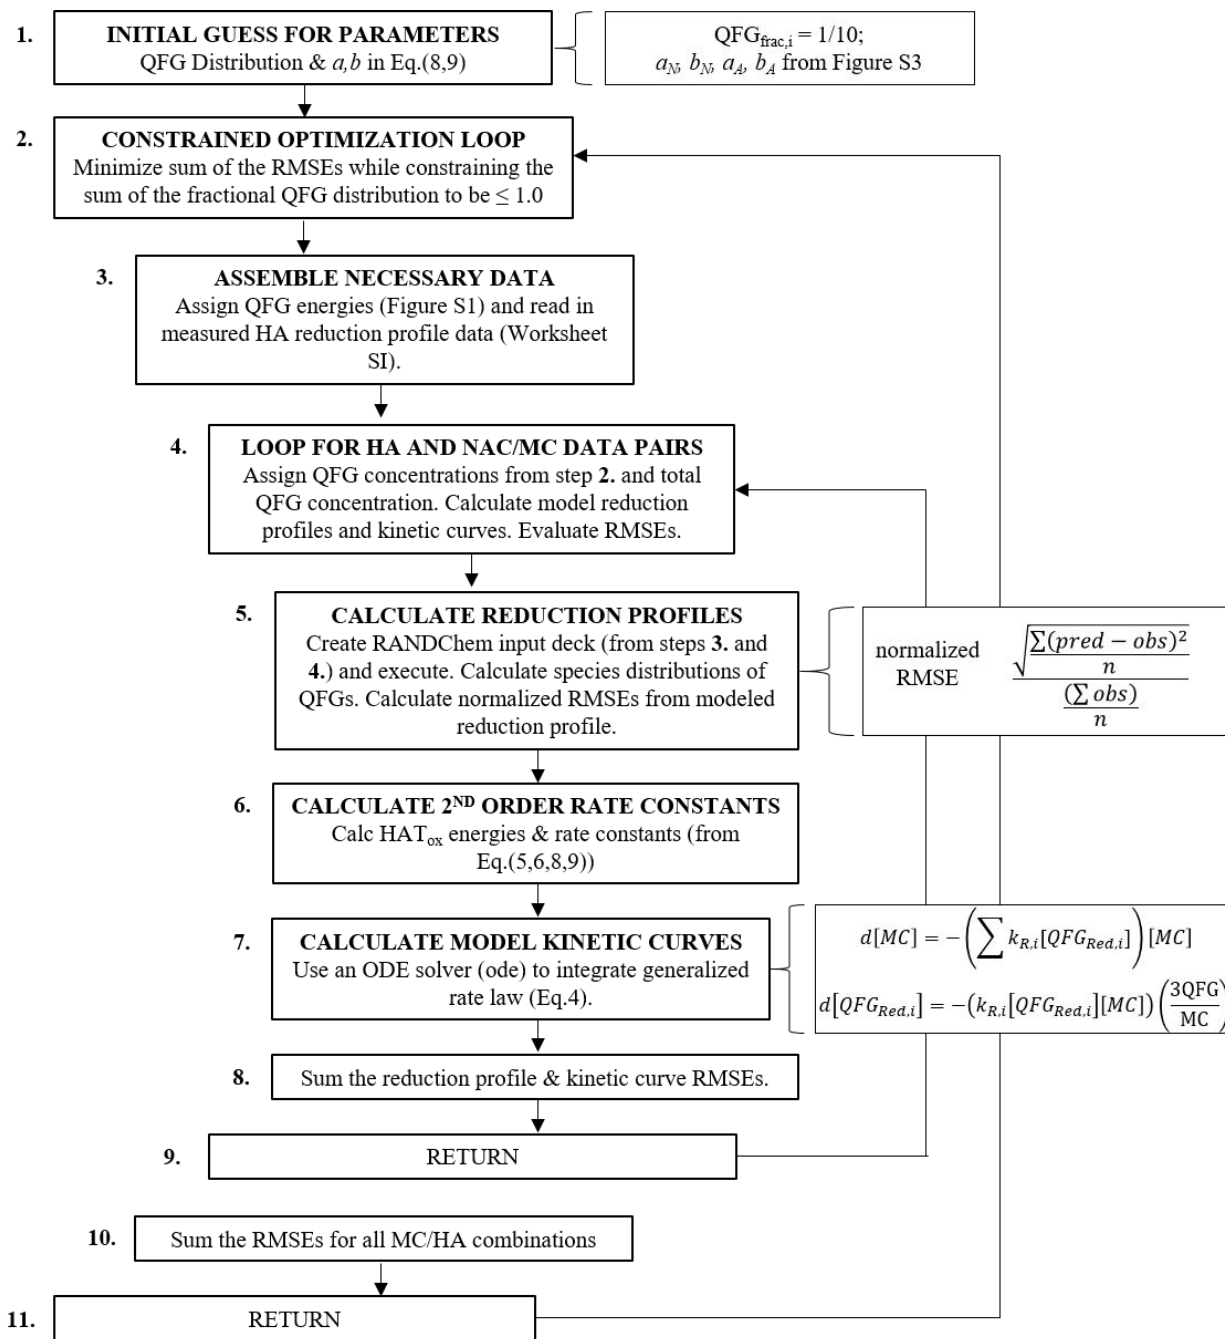

### Thermodynamic Description of Model Quinone-like Functional Groups

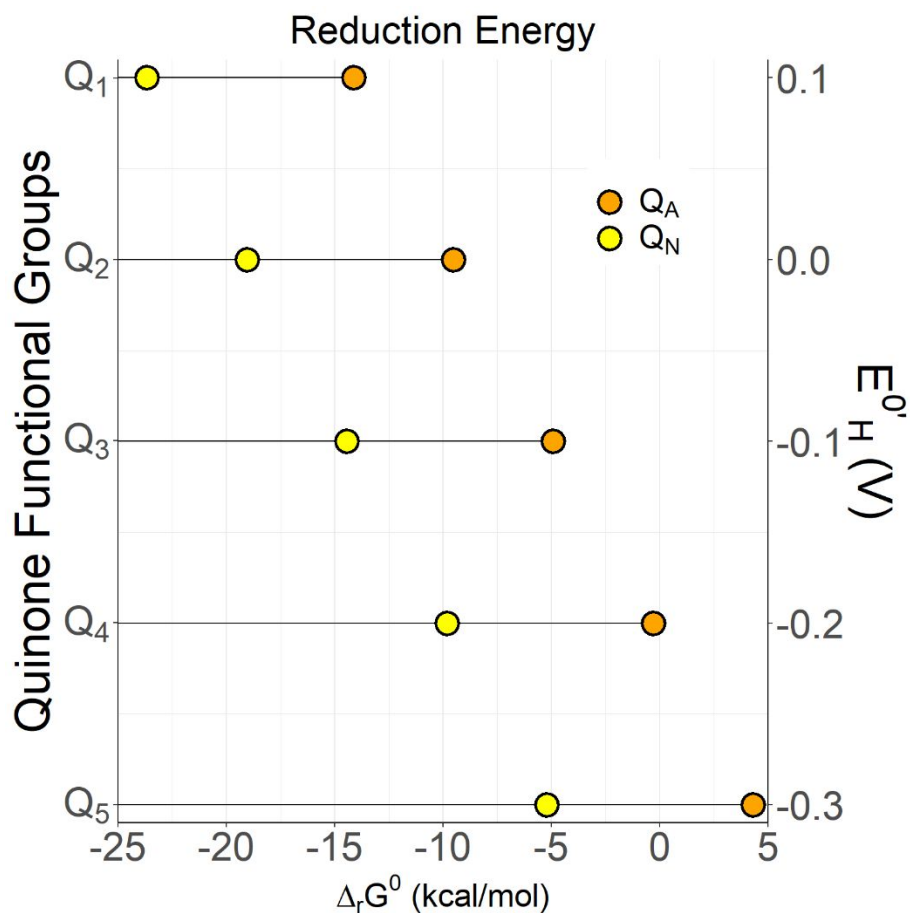

**Figure S1:** Energy Distribution of the ten model functional groups. Reduction energies were distributed evenly between the energy boundaries provided by the reduction profile.  $E^0{}_H$  is the formal potential (pH = 7) relative to the standard hydrogen electrode.  $Q_N$  and  $Q_A$  are the neutral and anionic function groups respectively.  $\Delta_r G^0$  corresponds to the standard state Gibbs free energy (pH = 0) of the reduction reactions for the QFGs (Eqs. 1, 2 in manuscript) and are used as their formation energies in the speciation calculations.

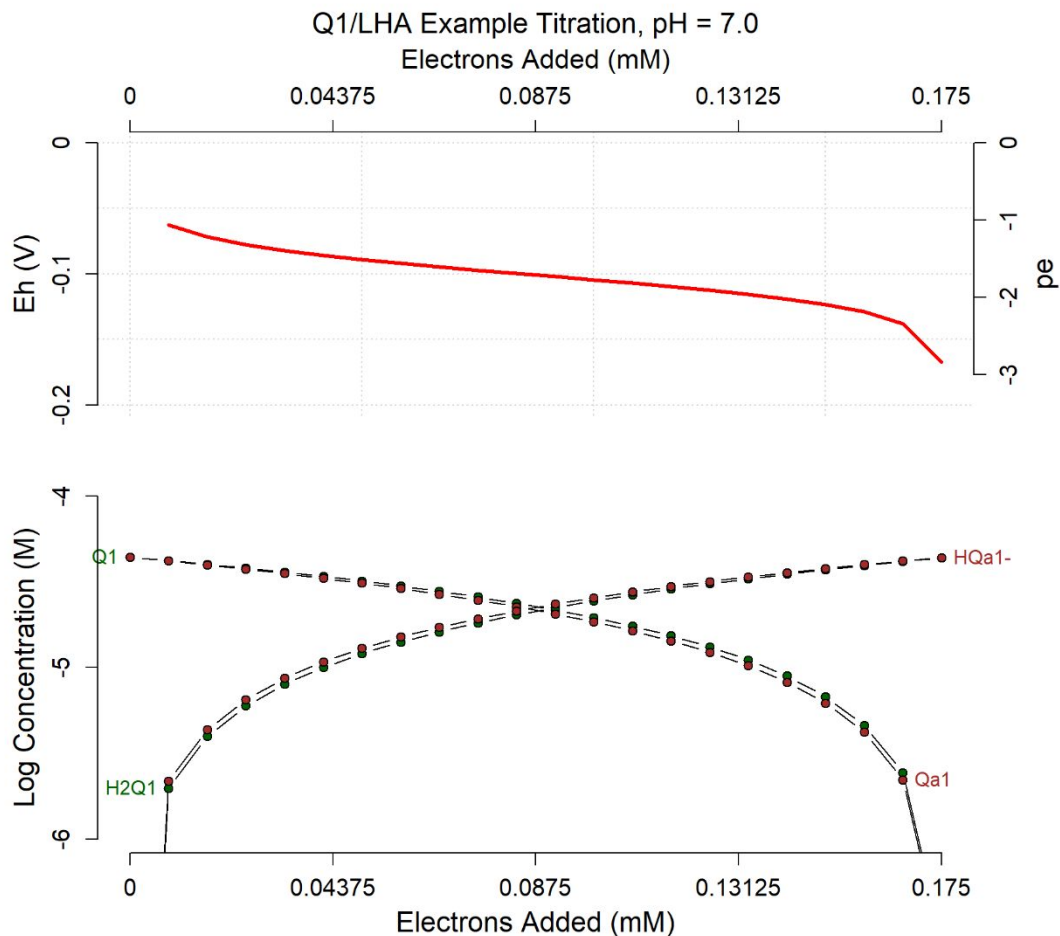

**Figure S2:** Results of example tableau in table 1. Model HA is comprised of one neutral ( $Q_{N1}$ ) and one anionic ( $Q_{A1}$ ) functional group at a 50/50 concentration ratio. Total functional group concentration is  $88 \mu\text{M}$  as calculated from the EAC of LHA. The  $Q_{N1}/Q_{A1}$  reduction energies were selected as Q3 in Figure S1 simply to bisect the measured values. Top: Red line is model output. Bottom: Concentration of the oxidized and reduced form of the two functional groups as a function of electrons titrated, or reduction extent.

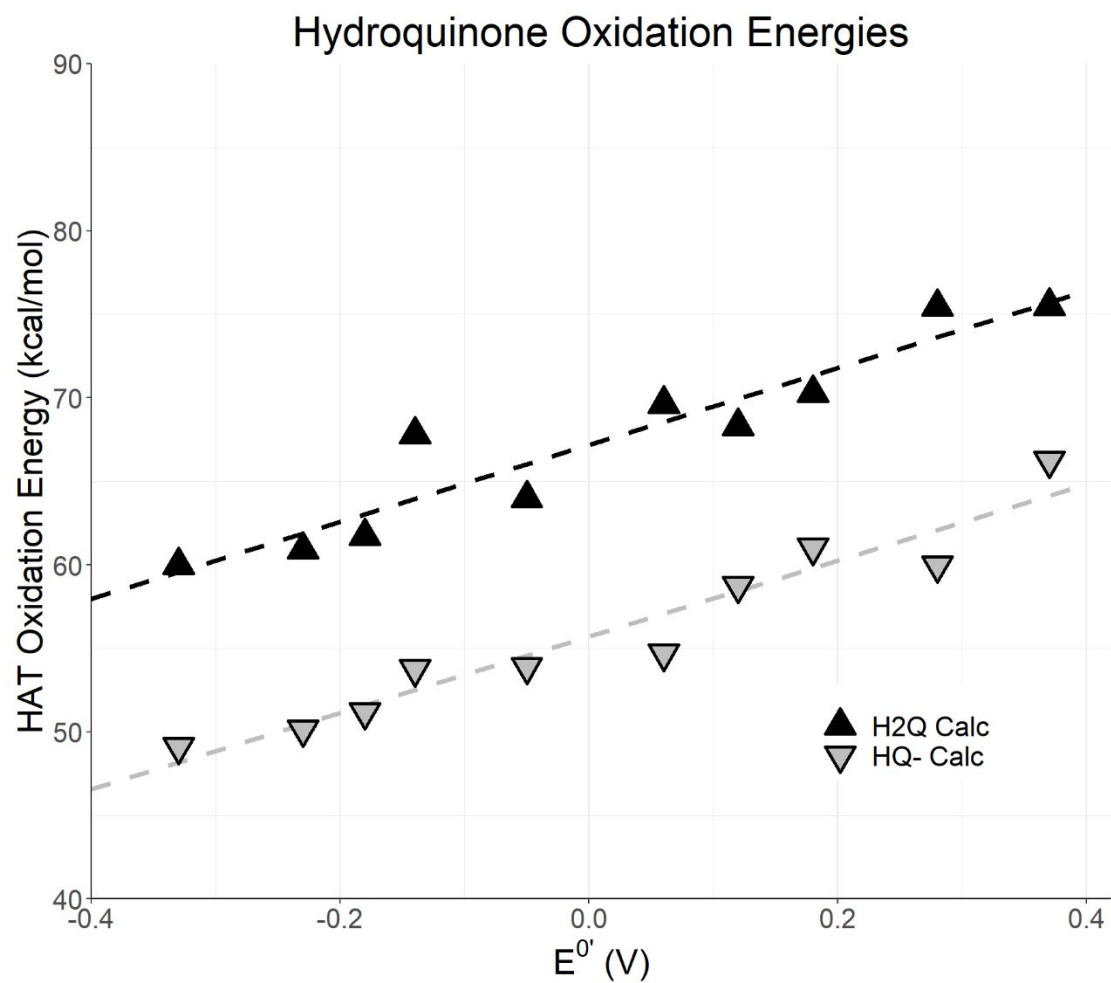

**Figure S3:** Calculated HAT oxidation energies as a function of reported formal potential for ten selected hydroquinones.



## ***Functional Group Distribution and Energies***

***Table S1:*** Model fitted functional group distribution for the mean HA model.

| Group                          | Composition<br>(Fraction) |
|--------------------------------|---------------------------|
| H <sub>2</sub> Q <sub>N1</sub> | 0.043919                  |
| H <sub>2</sub> Q <sub>N2</sub> | 0.01959                   |
| H <sub>2</sub> Q <sub>N3</sub> | 0.111252                  |
| H <sub>2</sub> Q <sub>N4</sub> | 0.410781                  |
| H <sub>2</sub> Q <sub>N5</sub> | 0.147647                  |
| HQ <sub>A1</sub> <sup>-</sup>  | 0.002697                  |
| HQ <sub>A2</sub> <sup>-</sup>  | 0.089338                  |
| HQ <sub>A3</sub> <sup>-</sup>  | 0.045164                  |
| HQ <sub>A4</sub> <sup>-</sup>  | 0.085892                  |
| HQ <sub>A5</sub> <sup>-</sup>  | 0.043541                  |

**Table S2:** Formal potentials and HAT oxidation energies for ten real hydroquinones and five model quinone-like functional groups. HAT energies for real hydroquinones are calculated quantum chemically, while the energies for the functional groups are calculated from Eq.8 with slopes and intercepts fitted through the mean HA model.

| Quinone Functional Group |                                    | E <sup>0'</sup><br>(V) | HAT <sub>ox</sub> Energies <sup>a</sup> |                                         |
|--------------------------|------------------------------------|------------------------|-----------------------------------------|-----------------------------------------|
|                          |                                    |                        | Neutral Form <sup>b</sup><br>(kcal/mol) | Anionic Form <sup>c</sup><br>(kcal/mol) |
| Existing Hydroquinones   | 1,2-benzoquinone                   | 0.37                   | 75.508                                  | 66.254                                  |
|                          | 1,4-benzoquinone                   | 0.28                   | 75.454                                  | 59.971                                  |
|                          | 2-hydroxy-1,4-benzoquinone         | 0.18                   | 70.288                                  | 61.036                                  |
|                          | 1,4-naphthoquinone-2-sulfonate     | 0.12                   | 68.317                                  | 58.766                                  |
|                          | 1,4-naphthoquinone                 | 0.06                   | 69.645                                  | 54.693                                  |
|                          | 5,8-dihydroxy-1,4-naphthoquinone   | -0.05                  | 63.989                                  | 53.904                                  |
|                          | 2-hydroxy-1,4-naphthoquinone       | -0.14                  | 67.818                                  | 53.765                                  |
|                          | 9,10-anthraquinone-2,6-disulfonate | -0.18                  | 61.731                                  | 51.189                                  |
|                          | 9,10-anthraquinone-2-sulfonate     | -0.23                  | 60.922                                  | 50.163                                  |
|                          | 9,10-anthraquinone                 | -0.33                  | 59.991                                  | 49.120                                  |
| Model Functional Groups  | Q <sub>1</sub>                     | 0.10                   | 84.220                                  | 73.371                                  |
|                          | Q <sub>2</sub>                     | 0.00                   | 78.931                                  | 67.417                                  |
|                          | Q <sub>3</sub>                     | -0.10                  | 73.647                                  | 61.475                                  |
|                          | Q <sub>4</sub>                     | -0.20                  | 68.348                                  | 55.534                                  |
|                          | Q <sub>5</sub>                     | -0.30                  | 63.061                                  | 49.592                                  |

<sup>a</sup> HAT<sub>ox</sub> = a(E<sup>0'</sup>) + b

<sup>b</sup> a = 52.89; b = 78.98

<sup>c</sup> a = 59.44; b = 67.45

**Table S3:** Conditions of NAC/MC reduction with HA experiments.

| HA/NAC   | pH       | HA Loading<br>(g/L) | EAC<br>(mmol e <sup>-</sup> /g <sub>HA</sub> ) |
|----------|----------|---------------------|------------------------------------------------|
| LHA/NTO  | 6.5, 8.0 | 0.5                 | 1.7                                            |
| LHA/DNAN | 6.5      | 0.5                 | 1.7                                            |
| LHA/NB   | 7.5      | 0.1                 | 1.7                                            |
| ESHA/NTO | 7.0      | 0.5                 | 1.96                                           |
| SRHA/NTO | 7.0      | 0.5                 | 0.8                                            |
| PPHA/NTO | 7.0      | 0.5                 | 1.7                                            |

### ***Reduction Profile of All HAs in Study***

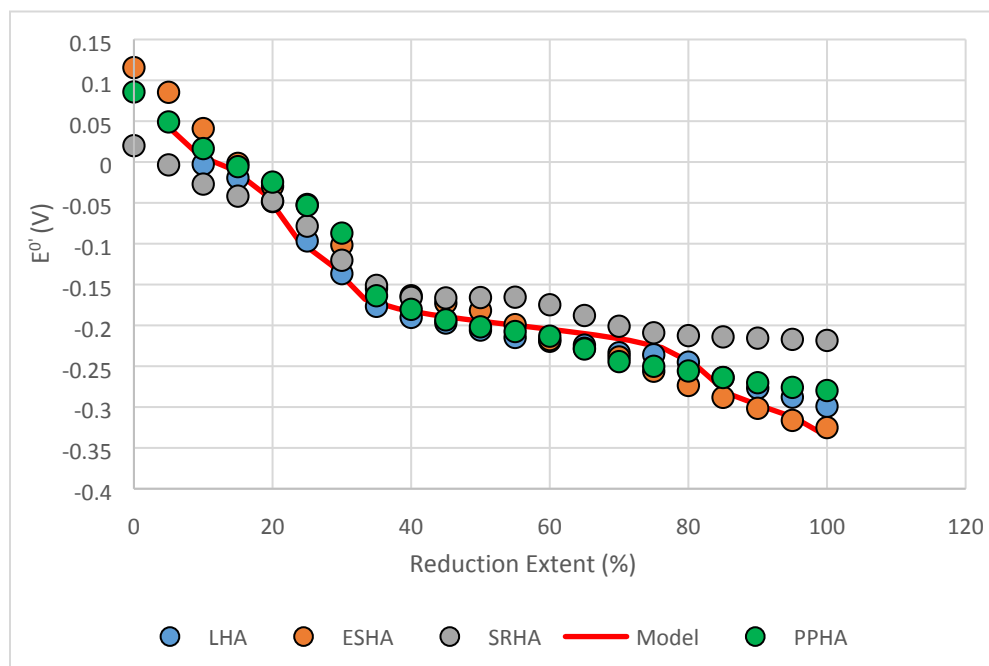

**Figure S4:** Measured reduction profiles for Leonardite Humic Acid (LHA), Eliot Soil Humic Acid (ESHA), Suwanee River Humic Acid (SRHA), and Pahokee Peat Humic Acid (PPHA), as well as the Mean HA model fit.

## Independent ESHA/NTO Optimization

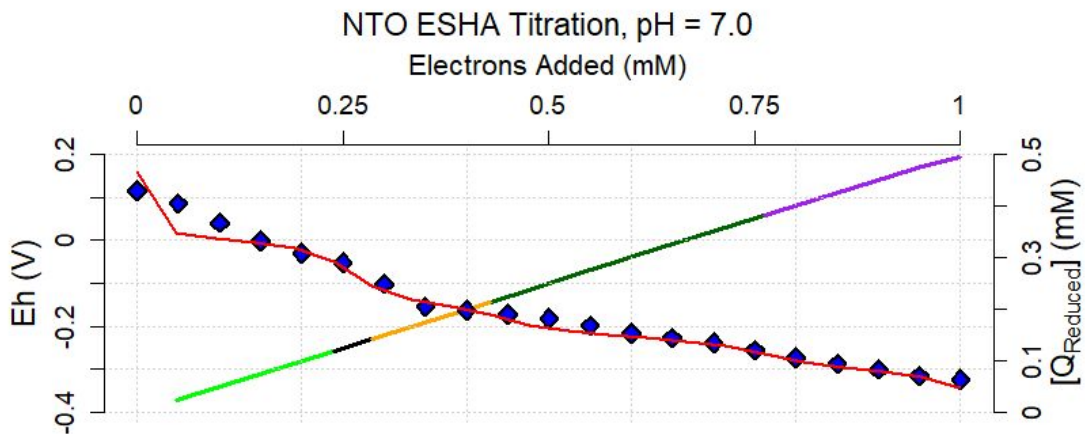

**Figure S5:** Reduction profile as potential vs. HA reduction extent for ESHA (blue diamonds) and the model fit (red line). Colored line on base indicates the active or redox controlling functional group as a function of reduction extent (right Y axis).

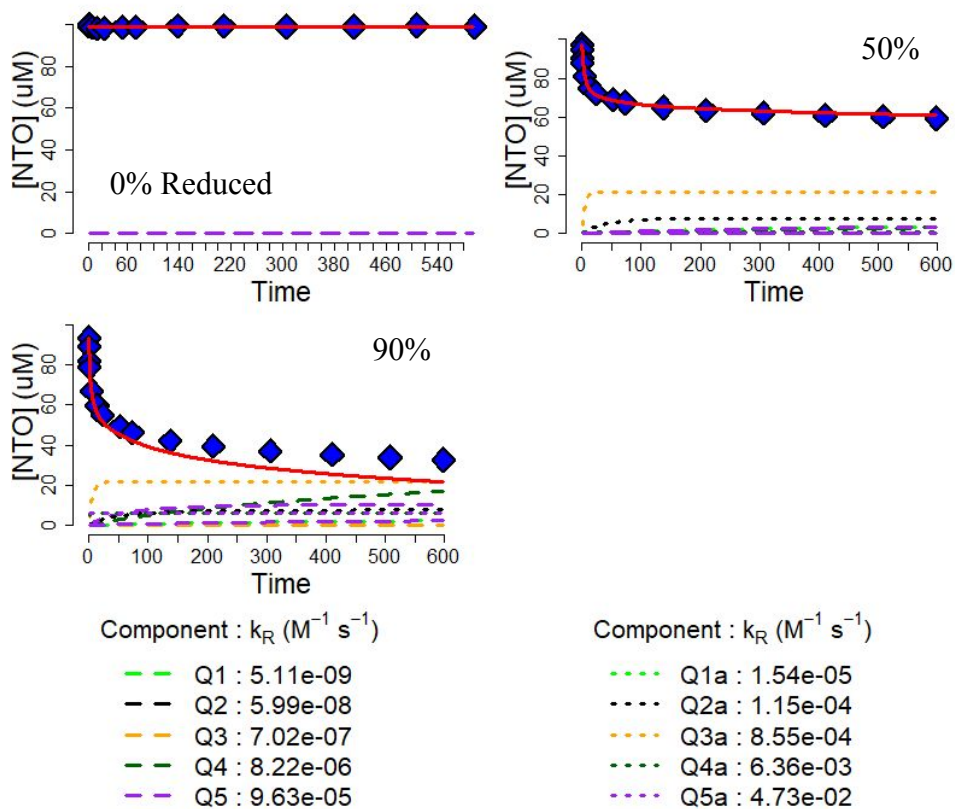

**Figure S6:** NTO concentration as a function of time for reduction with Eliot Soil Humic Acid (ESHA). Dashed and dotted lines correspond to the contribution of NTO loss from individual QFGs (dashed = neutral, dotted = anionic).

**Example of NAC/MC Reduction kinetic Curves in Linear-Linear Scale**

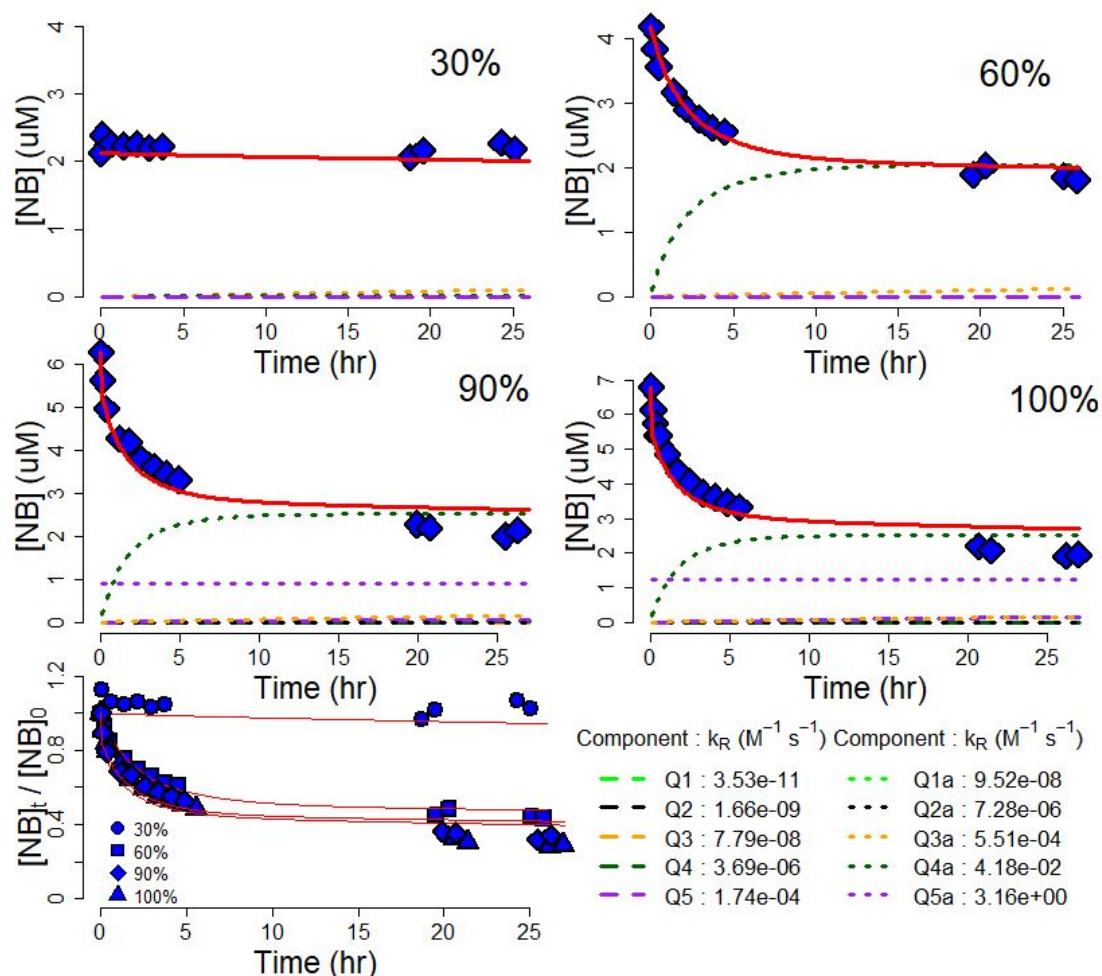

**Figure S7:** NB concentration as a function of time for reduction with Leonardite Humic Acid (LHA) at 30%, 60%, 90% and 100% reduced LHA. Same data presented in Figure 4, row A but plotted on a linear-linear scale. Dashed and dotted lines correspond to the contribution of NB loss from individual QFGs (dashed = neutral, dotted = anionic).

## Example LHA Input Deck

LHA\_DNAN\_10Q  
LITER  
1.0  
MULTIPLIERS

RT  
25.  
LIMIT

1000  
ROWS

|     |      |      |      |      |
|-----|------|------|------|------|
| H2O | 1    |      |      |      |
|     | .000 | .000 | .000 | .000 |
| Hp  | 0    |      |      |      |
|     | .000 | .000 | .000 | .000 |
| Em  | 0    |      |      |      |
|     | .000 | .000 | .000 | .000 |
| Q1  | 0    |      |      |      |
|     | .000 | .000 | .000 | .000 |
| Q2  | 0    |      |      |      |
|     | .000 | .000 | .000 | .000 |
| Q3  | 0    |      |      |      |
|     | .000 | .000 | .000 | .000 |
| Q4  | 0    |      |      |      |
|     | .000 | .000 | .000 | .000 |
| Q5  | 0    |      |      |      |
|     | .000 | .000 | .000 | .000 |
| Qd1 | 0    |      |      |      |
|     | .000 | .000 | .000 | .000 |
| Qd2 | 0    |      |      |      |
|     | .000 | .000 | .000 | .000 |
| Qd3 | 0    |      |      |      |
|     | .000 | .000 | .000 | .000 |
| Qd4 | 0    |      |      |      |
|     | .000 | .000 | .000 | .000 |
| Qd5 | 0    |      |      |      |
|     | .000 | .000 | .000 | .000 |

END

MATRIX

|        |        |     |     |        |        |        |
|--------|--------|-----|-----|--------|--------|--------|
| Aqueou | .00    | .00 | .00 |        | .0     |        |
| H2O    | -56.69 | .00 | .00 | 1.0H2O |        | .0     |
| OHm    | -37.59 | .00 | .00 | 1.0H2O | -1.0Hp | .0     |
| Hp     | .00    | .00 | .00 | 1.0Hp  |        | .0     |
| O2     | 3.92   | .00 | .00 | 2.0H2O | -4.0Hp | -4.0Em |
| H2     | 4.207  | .00 | .00 | 2.0Hp  | 2.0Em  |        |
| Q1     | 0.000  | .00 | .00 | 1.0Q7  |        |        |
| H2Q1   | -12.63 | .00 | .00 | 1.0Q7  | 2.0Hp  | 2.0Em  |
| Q2     | 0.000  | .00 | .00 | 1.0Qa  |        |        |
| H2Q2   | -12.00 | .00 | .00 | 1.0Qa  | 2.0Hp  | 2.0Em  |
| Q3     | 0.000  | .00 | .00 | 1.0Qb  |        |        |
| H2Q3   | -11.25 | .00 | .00 | 1.0Qb  | 2.0Hp  | 2.0Em  |
| Q4     | 0.000  | .00 | .00 | 1.0Q8  |        |        |
| H2Q4   | -10.79 | .00 | .00 | 1.0Q8  | 2.0Hp  | 2.0Em  |
| Q5     | 0.000  | .00 | .00 | 1.0Q9  |        |        |
| H2Q5   | -8.482 | .00 | .00 | 1.0Q9  | 2.0Hp  | 2.0Em  |
| Qd1    | 0.000  | .00 | .00 | 1.0Qd7 |        |        |
| H2Qd1  | -12.63 | .00 | .00 | 1.0Qd7 | 1.0Hp  | 2.0Em  |
| Qd2    | 0.000  | .00 | .00 | 1.0Qda |        |        |

|       |        |     |     |        |       |       |
|-------|--------|-----|-----|--------|-------|-------|
| H2Qd2 | -12.00 | .00 | .00 | 1.0Qda | 1.0Hp | 2.0Em |
| Qd3   | 0.000  | .00 | .00 | 1.0Qdb |       |       |
| H2Qd3 | -11.25 | .00 | .00 | 1.0Qdb | 1.0Hp | 2.0Em |
| Qd4   | 0.000  | .00 | .00 | 1.0Qd8 |       |       |
| H2Qd4 | -10.79 | .00 | .00 | 1.0Qd8 | 1.0Hp | 2.0Em |
| Qd5   | 0.000  | .00 | .00 | 1.0Qd9 |       |       |
| H2Qd5 | -8.482 | .00 | .00 | 1.0Qd9 | 1.0Hp | 2.0Em |
| pH    | .000   | .00 | .00 |        |       |       |
| HPLUS | .000   | .00 | .00 | 1.0Hp  |       |       |

END

NOMESSAGES

RETURN

|       |        |        |     |
|-------|--------|--------|-----|
| 21    | Aqueou |        |     |
| H2O   | 1.000  | 1.000  | 1.0 |
| Em    | 1.0e-9 | 8.5e-4 | 1.0 |
| Q1    | 3.6e-5 | 3.6e-5 | 1.0 |
| Q2    | 3.6e-5 | 3.6e-5 | 1.0 |
| Q3    | 3.6e-5 | 3.6e-5 | 1.0 |
| Q4    | 3.6e-5 | 3.6e-5 | 1.0 |
| Q5    | 3.6e-5 | 3.6e-5 | 1.0 |
| Qd1   | 3.6e-5 | 3.6e-5 | 1.0 |
| Qd2   | 3.6e-5 | 3.6e-5 | 1.0 |
| Qd3   | 3.6e-5 | 3.6e-5 | 1.0 |
| Qd4   | 3.6e-5 | 3.6e-5 | 1.0 |
| Qd5   | 3.6e-5 | 3.6e-5 | 1.0 |
| HPLUS | 1.0    | 1.0    | 1.0 |
| pH    | 7.0    | 7.0    | 1.0 |

END

EXIT
